# Supplementary material for: Reseña de libro: "New Markets, New Opportunities? Economic and Social Mobility in a Changing World ", por Nancy Birdsall y Carol Graham (a cargo de la edición)Bruno S. Sergi
Source: Royal Society of Chemistry journal article supplement (doi:10.1039/c1ob06369c), 2000-01-01

# Synthesis and Configuration Determination of All Enantiopure Stereoisomers of the Melatonin Receptor Ligand 4-Phenyl-2-propionamidotetralin using an Expedient Optical Resolution of 4-Phenyl-2-tetralone

Simone Lucarini,<sup>a</sup> Silvia Bartolucci,<sup>a</sup> Annalida Bedini,<sup>a</sup> Giuseppe Gatti,<sup>a</sup> Pierfrancesco Orlando,<sup>a</sup> Giovanni Piersanti,<sup>a</sup> and Gilberto Spadoni\*<sup>a</sup>

<sup>a</sup>Department of Biomolecular Sciences, University of Urbino "Carlo Bo", piazza Rinascimento 6, Urbino (PU), I-61029, Italy. Fax: +39 0722 303313; Tel: +39 0722 303322; E-mail: gilberto.spadoni@uniurb.it

## Experimental Supplementary Information

| Table of contents           |                                                     | Pages |
|-----------------------------|-----------------------------------------------------|-------|
| NOESY Spectrum of compound  | <b>6a</b>                                           | S2    |
|                             | <b>6b</b>                                           | S3    |
|                             | <b>6c</b>                                           | S4    |
|                             | <b>6d</b>                                           | S5    |
| Chiral HPLC Chromatogram of | <b><i>cis</i> and <i>trans</i> mixture of (±)-1</b> | S6    |
|                             | <b>(+)-(2<i>S</i>,4<i>S</i>)-1a</b>                 | S7    |
|                             | <b>(-)-(2<i>R</i>,4<i>R</i>)-1b</b>                 | S7    |
|                             | <b>(+)-(2<i>R</i>,4<i>S</i>)-1c</b>                 | S8    |
|                             | <b>(-)-(2<i>S</i>,4<i>R</i>)-1d</b>                 | S8    |

### NOESY Spectrum of compound 6a

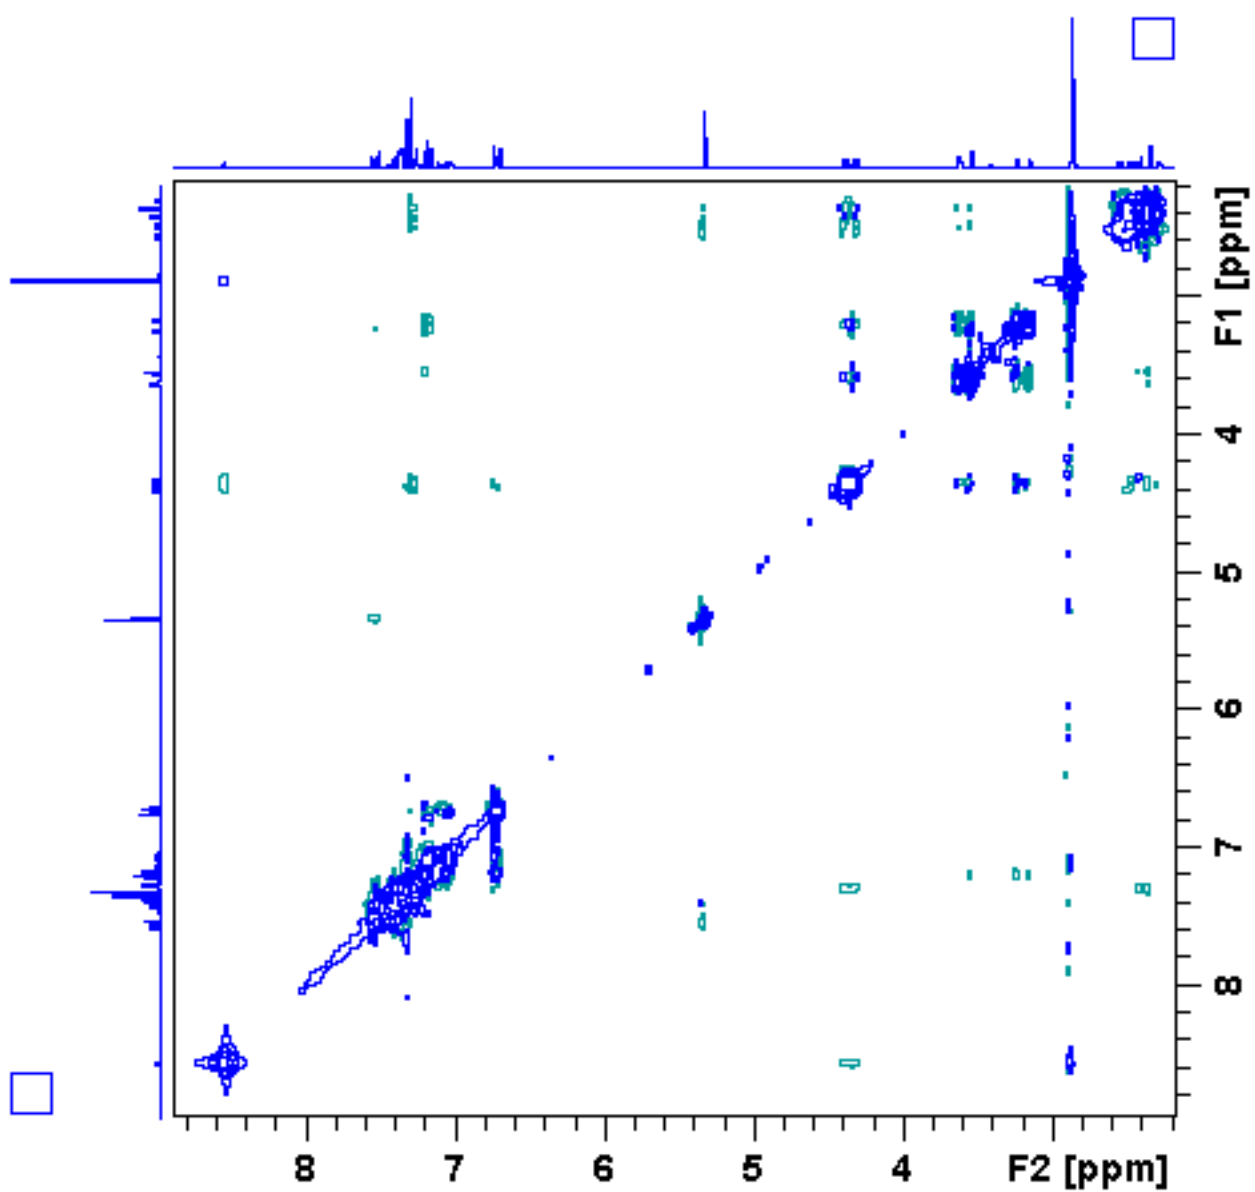

### NOESY Spectrum of compound 6b

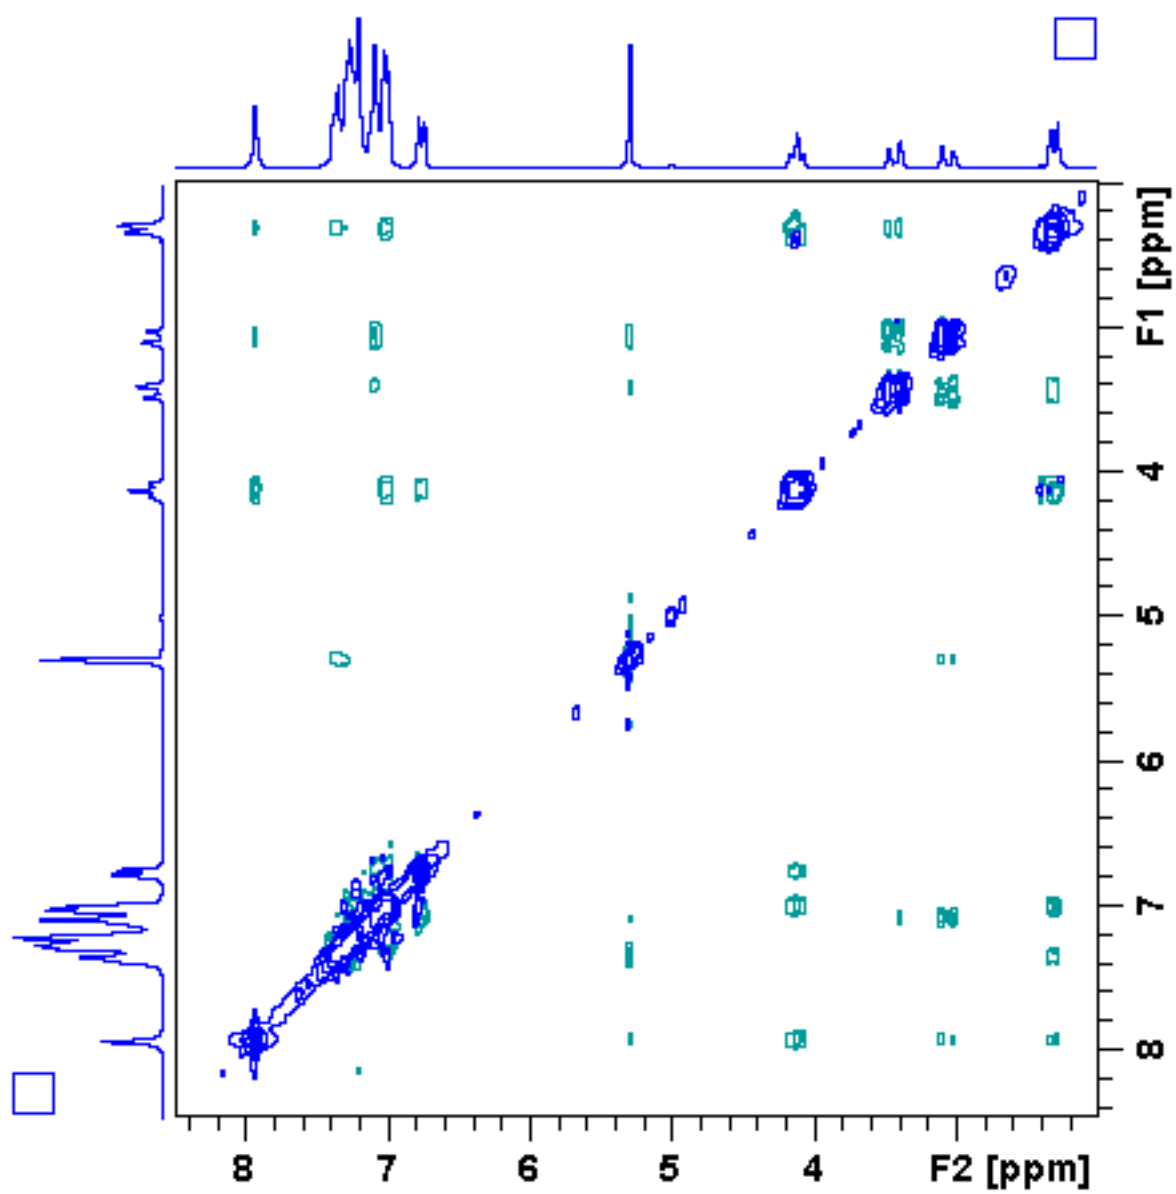

### NOESY Spectrum of compound 6c

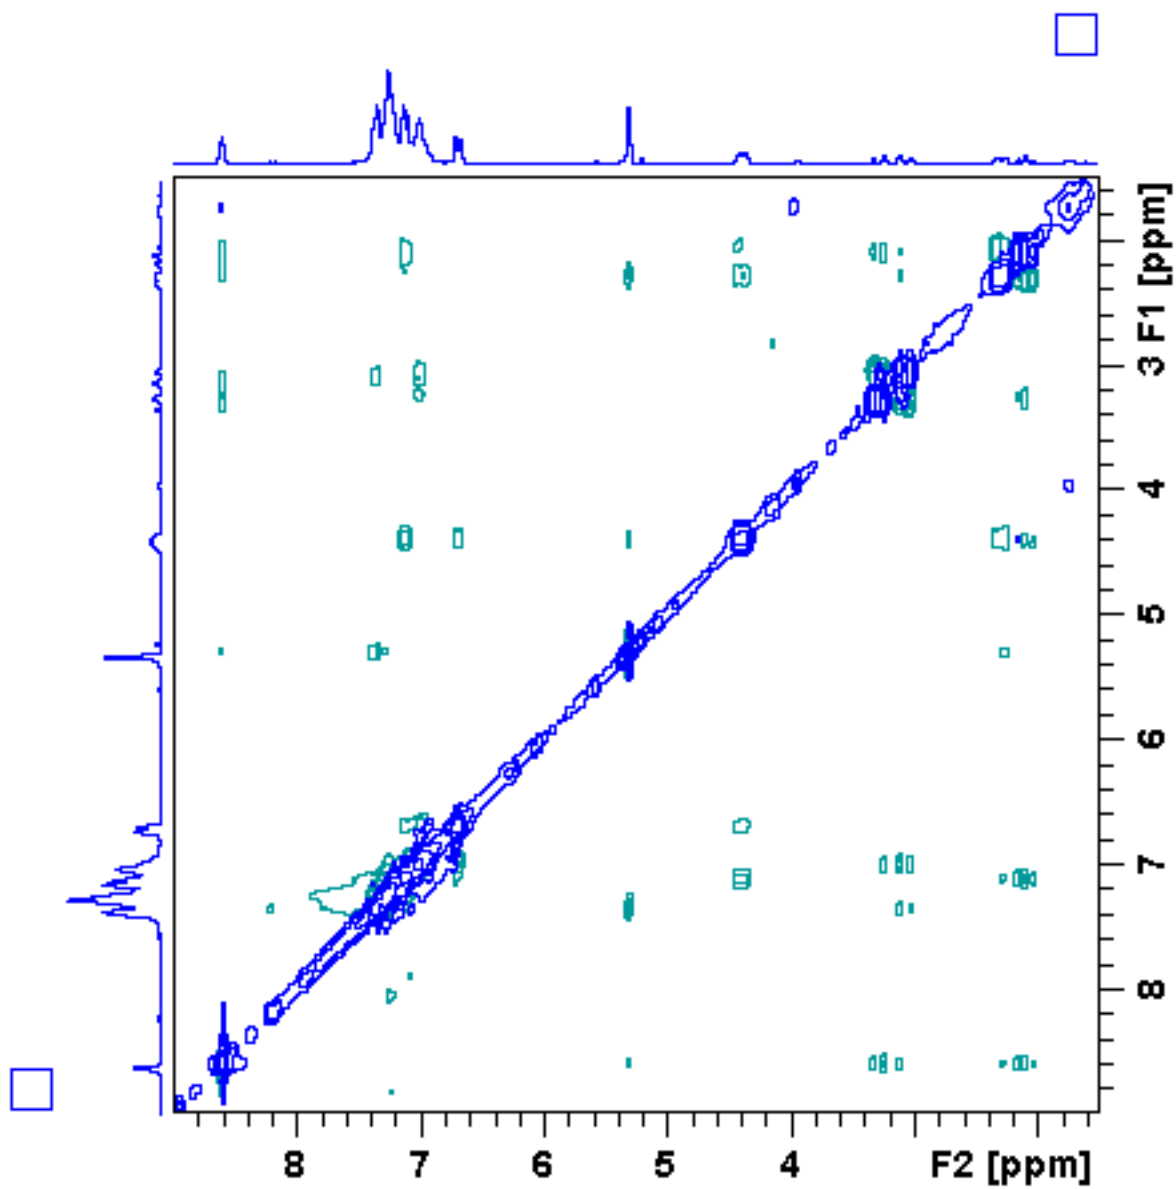

### NOESY Spectrum of compound 6d

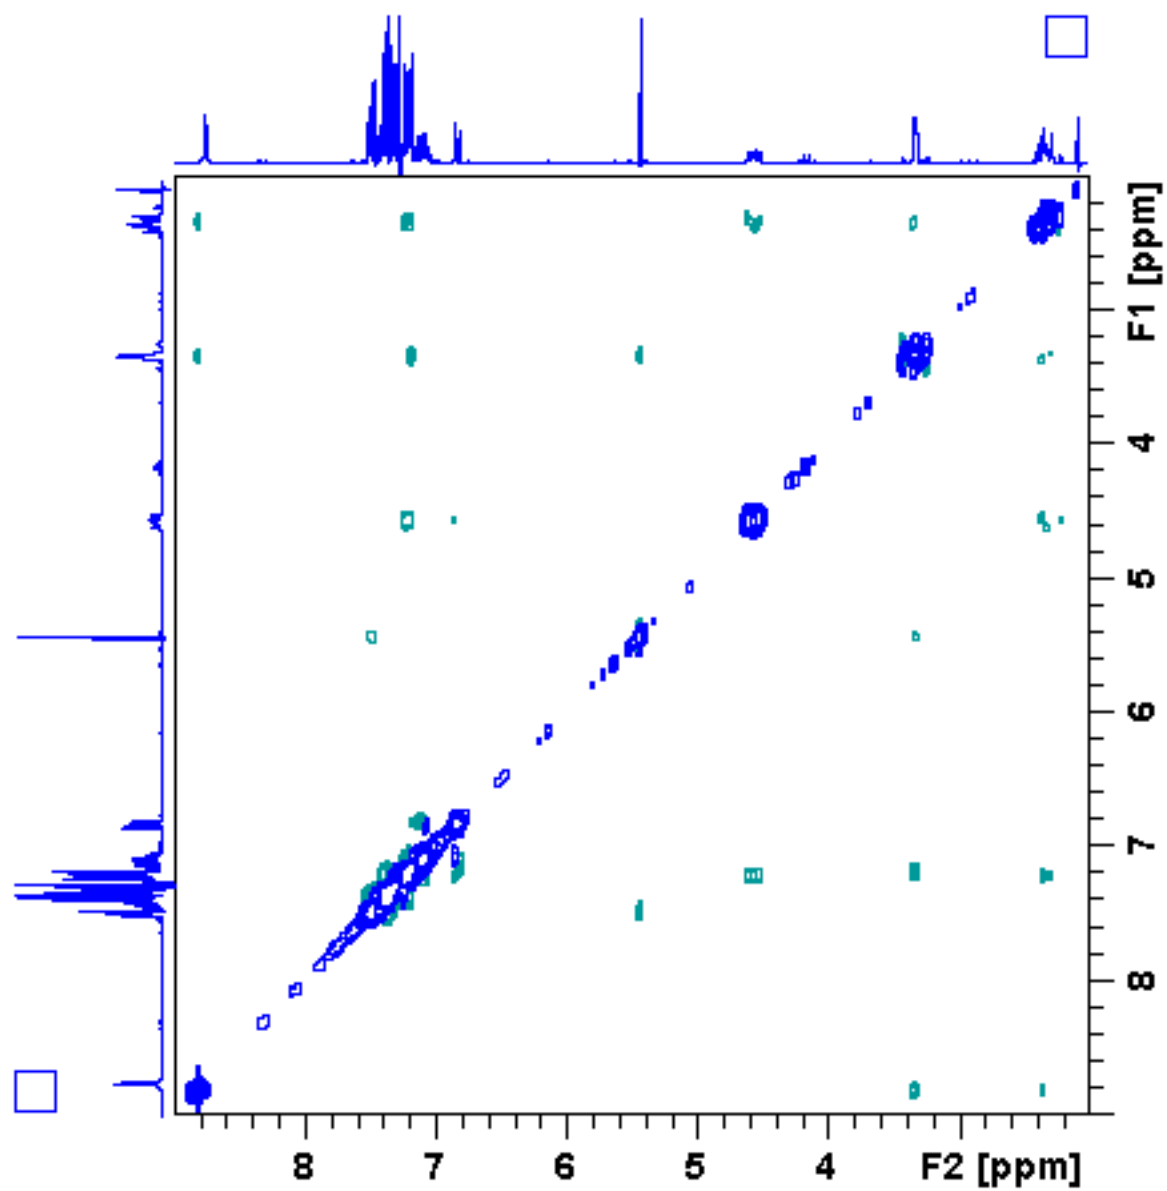

### Chiral HPLC Chromatogram of *cis* and *trans* mixture of (±)-1

ATTEN(0)=5  
A.SAVE  
START

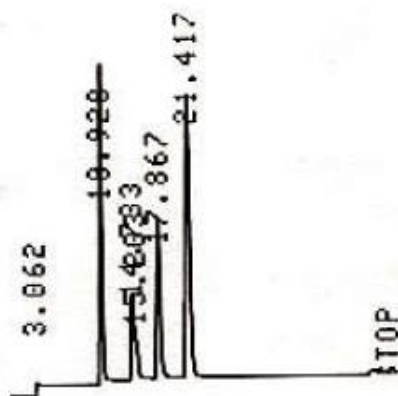

CHROMATOGRAM 1 MEMORIZED

CHROMATOPAC C-R3A  
SAMPLE NO 0  
REPORT NO 436

FILE 0  
METHOD 41  
NAME

| PKNO  | TIME   | AREA   | MK | IDNO | CONC    | NAME |
|-------|--------|--------|----|------|---------|------|
| 1     | 10.928 | 182913 |    |      | 25.0659 |      |
| 2     | 14.733 | 67514  |    |      | 9.2519  |      |
| 3     | 15.203 | 25639  | V  |      | 3.5134  |      |
| 4     | 17.867 | 148967 |    |      | 20.4139 |      |
| 5     | 21.417 | 304698 |    |      | 41.7548 |      |
| TOTAL |        |        |    |      | 729730  |      |
|       |        |        |    |      | -----   | 100  |

### Chiral HPLC Chromatogram of compound (+)-(2*S*,4*S*)-1a

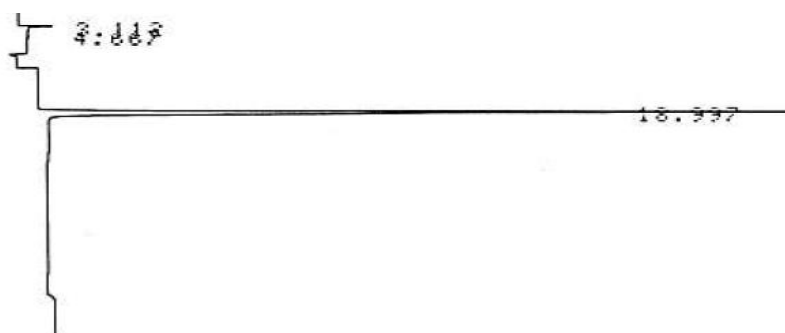

|             |        |         |    |      |         |      |
|-------------|--------|---------|----|------|---------|------|
| CHROMATOPAC | C-R3A  | FILE    | 0  |      |         |      |
| SAMPLE NO   | 0      | METHOD  | 41 |      |         |      |
| REPORT NO   | 469    |         |    |      |         |      |
| PKNO        | TIME   | AREA    | MK | IDNO | CONC    | NAME |
| 1           | 3.112  | 19881   |    |      | 1.3361  |      |
| 2           | 18.997 | 1468060 |    |      | 98.6639 |      |
|             | TOTAL  | 1487940 |    |      | 100     |      |

### Chiral HPLC Chromatogram of compound (-)-(2*R*,4*R*)-1b

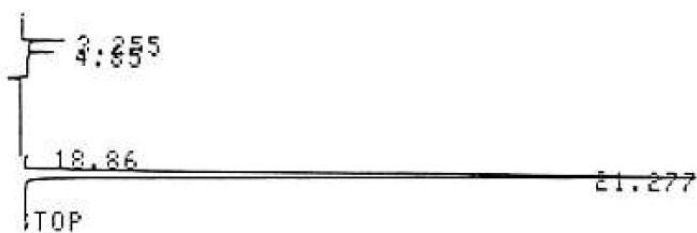

|             |        |         |    |      |        |      |
|-------------|--------|---------|----|------|--------|------|
| CHROMATOPAC | C-R3A  | FILE    | 0  |      |        |      |
| SAMPLE NO   | 0      | METHOD  | 41 |      |        |      |
| REPORT NO   | 471    |         |    |      |        |      |
| PKNO        | TIME   | AREA    | MK | IDNO | CONC   | NAME |
| 1           | 3.255  | 26154   |    |      | 1.4947 |      |
| 2           | 4.85   | 19323   |    |      | 1.1043 |      |
| 3           | 21.277 | 1704344 |    |      | 97.401 |      |
|             | TOTAL  | 1749822 |    |      | 100    |      |

### Chiral HPLC Chromatogram of compound (+)-(2*R*,4*S*)-1c

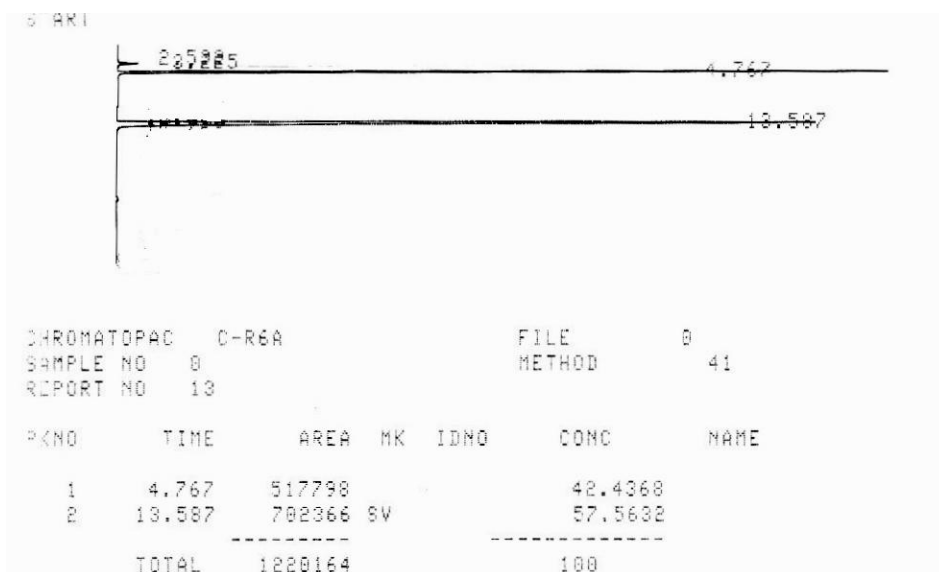

### Chiral HPLC Chromatogram of compound (-)-(2*S*,4*R*)-1d

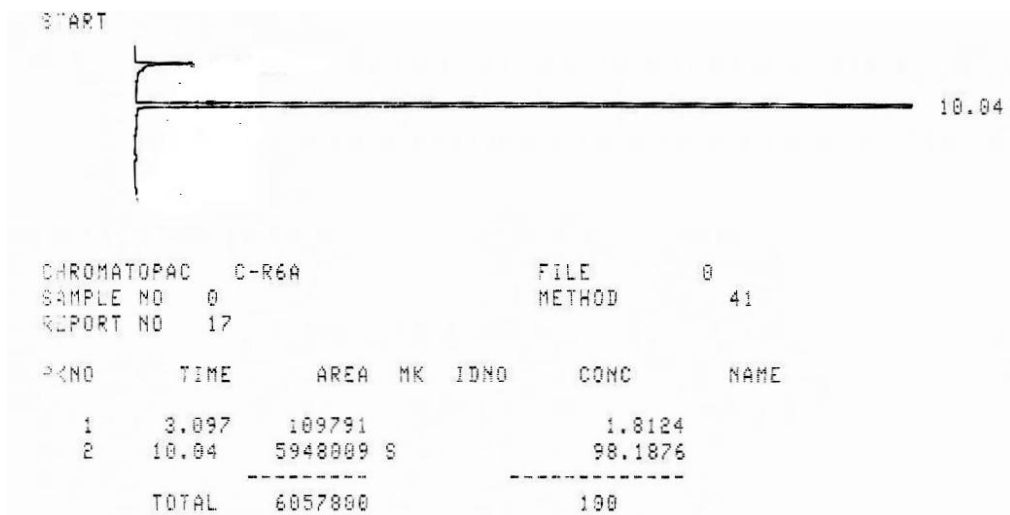

Supplement: c1ob06369c.pdf [file c1ob06369c.pdf]
